# Supplementary material
Source: publisher figshare collection journal article supplement (https://acs.figshare.com/ndownloader/files/4532965)
Supplement: Supplementary file 1 [file 4532965]

## Supporting Information

### Signal Amplification for Electrochemical Biosensing Using

#### *Amplification-by-Polymerization*

Yafeng Wu<sup>1,2</sup>, Songqin Liu<sup>2,\*</sup>, and Lin He<sup>1,\*</sup>

<sup>1</sup>Department of Chemistry, North Carolina State University, Raleigh, NC 27695,  
USA

<sup>2</sup>School of Chemistry and Chemical Engineering, Southeast University, Nanjing,  
210096, P. R. China

Corresponding Author: Lin\_He@NCSU.EDU, 919-515-2993 (Tel), 919-515-8920

(Fax). [liusq@seu.edu.cn](mailto:liusq@seu.edu.cn), 86-25-52090613 (Tel).

**Supporting Information Scheme 1.** Polymer grafting in AGET ATRP using ascorbic acid as the reducing agent.<sup>21</sup>

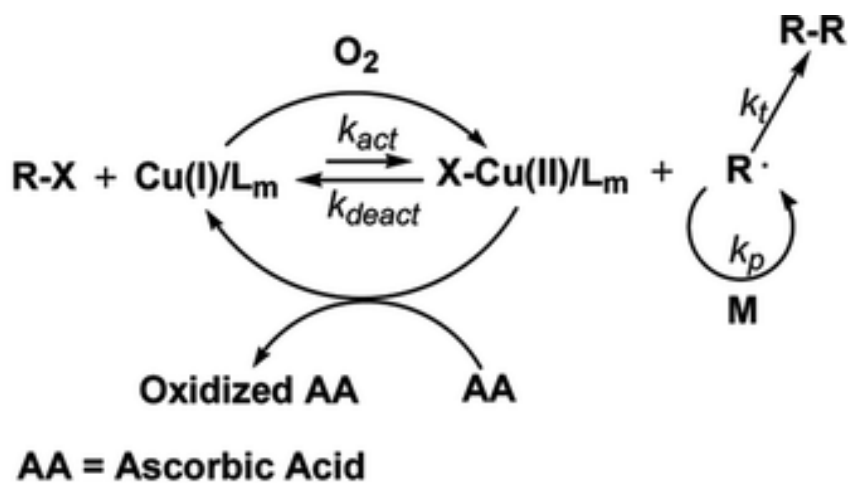

Wu, et al, "Electrochemical Sensing ..." Supporting Information Scheme 1.

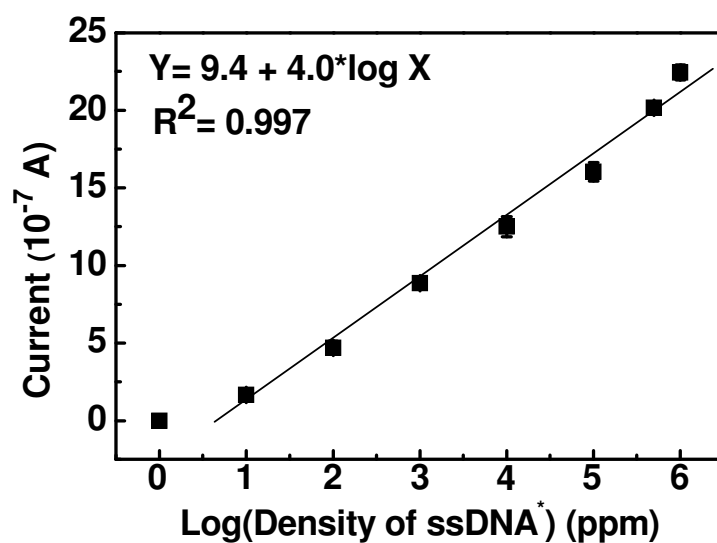

**Supporting Information Figure 1.** Quantification of the surface density of ssDNA\*.

ssDNA\* was pre-mixed with the unmodified ssDNA of the same sequence at various ratios from 10 ppm to 100% while the total DNA concentration was maintained at 1  $\mu$ M. The linear fitting was plotted using all data points except the (0, 0) point.

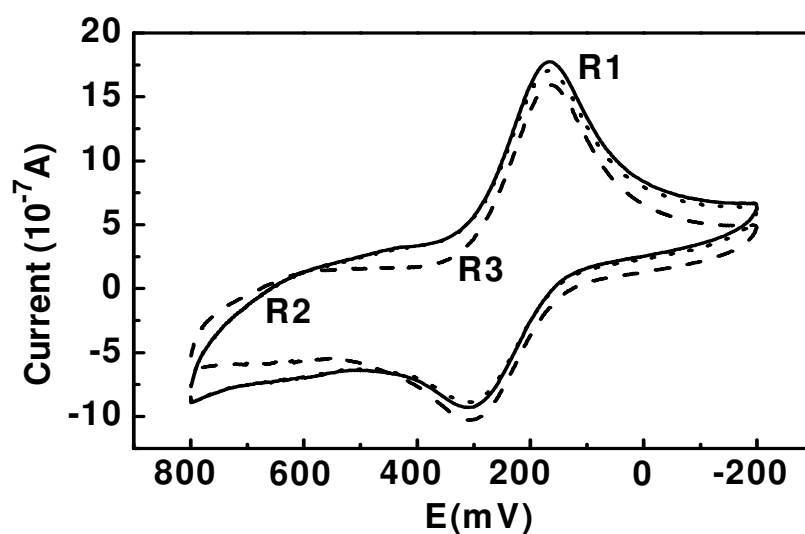

**Supporting Information Figure 2.** Reproducibility of polymerization-assisted biosensing in detection of DNA hybridization. The electrodes were prepared on three separated days following the protocol described in the experimental section. Cyclic voltammetric curves were obtained in 0.1 M  $\text{HClO}_4$  solution at a scan rate of  $100 \text{ mV s}^{-1}$ .
